# Supplementary material for: Precursor directed regioselective synthesis of partially reduced benzo[e]indene through oxidative cyclization and benzo[h]quinolines
Source: Royal Society of Chemistry journal article supplement (doi:10.1039/c4ra13612h), 2015-01-01

# Precursor directed regioselective synthesis of partially reduced benzo[*e*]indene through oxidative cyclization and benzo[*h*]quinolines

Surjeet Singh, Rahul Panwar, Pratik Yadav, Ismail Althagafi, Satya Narayan Sahu and Ramendra Pratap\*

## Supporting information

| Contents                                                                 | Page |
|--------------------------------------------------------------------------|------|
| <sup>1</sup> H and <sup>13</sup> C spectra of all the reported compounds | 2-12 |

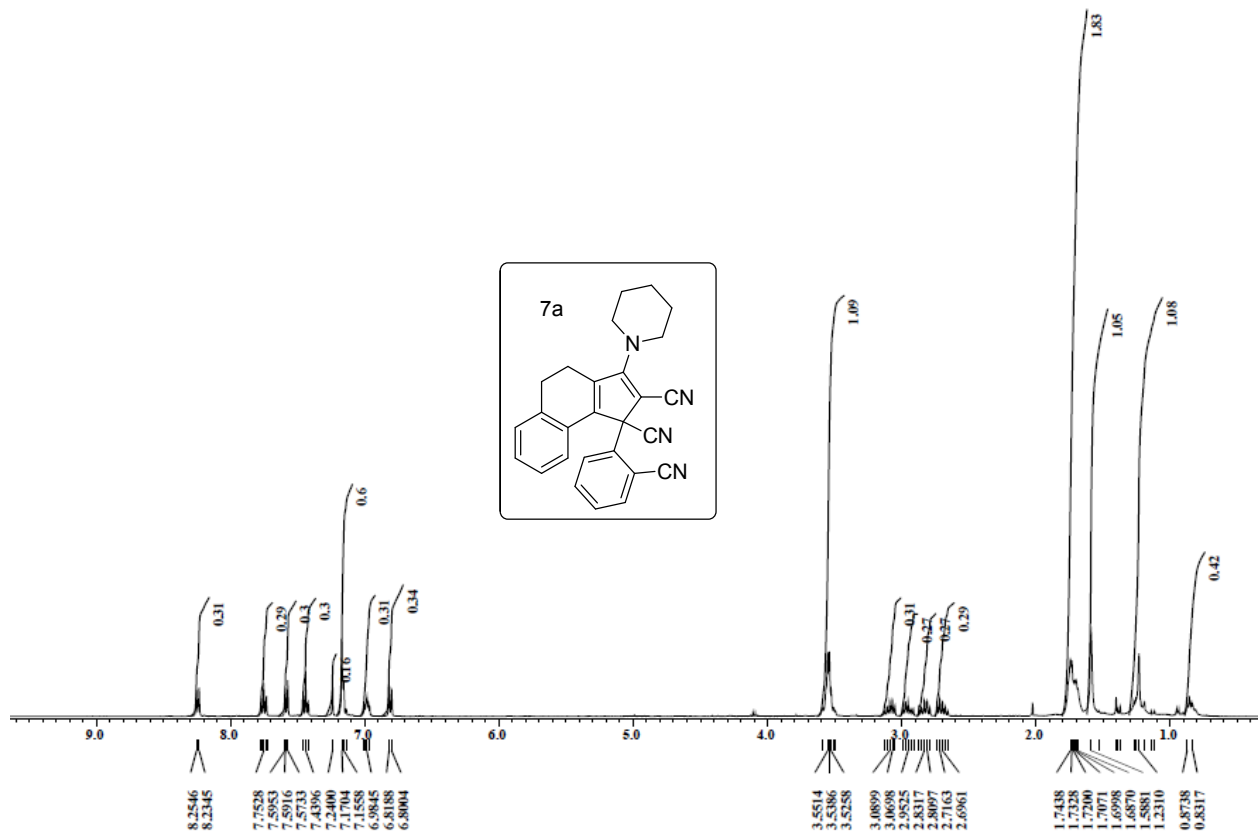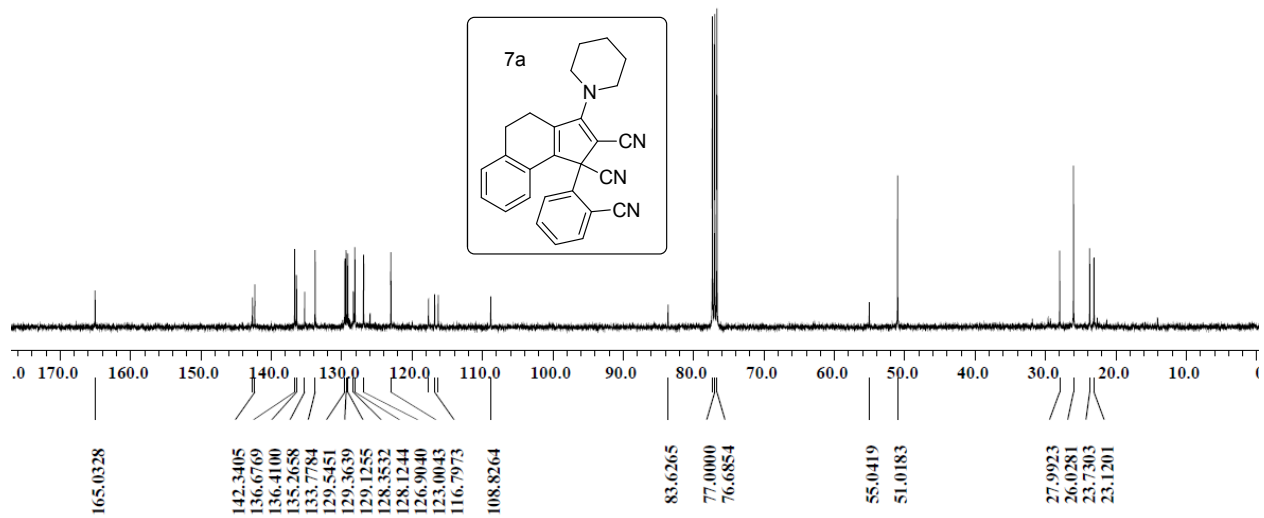

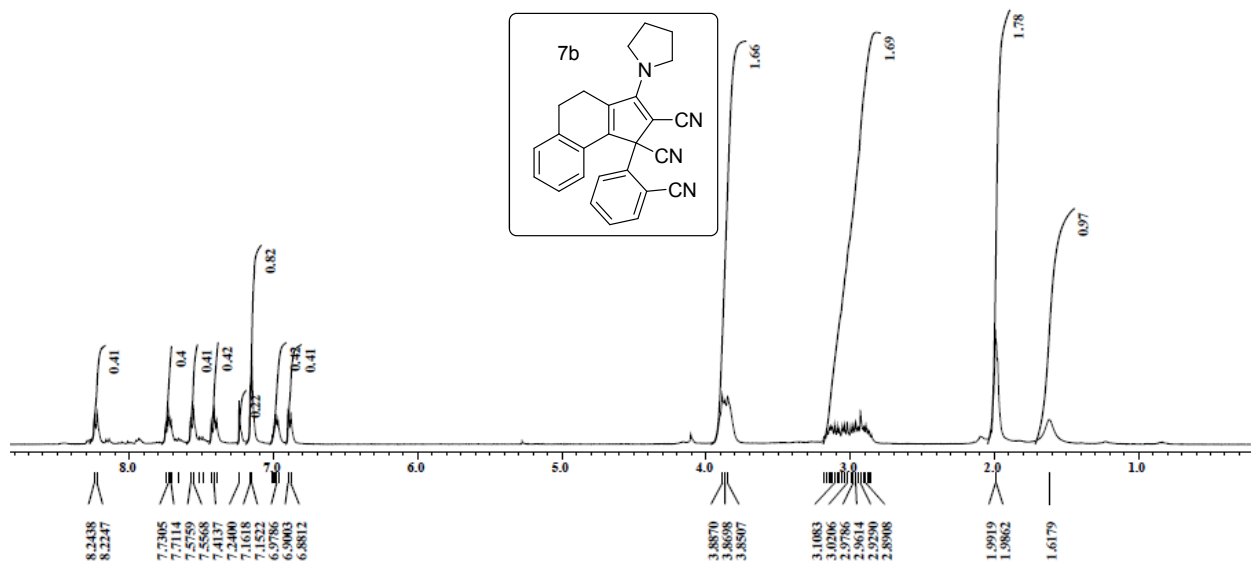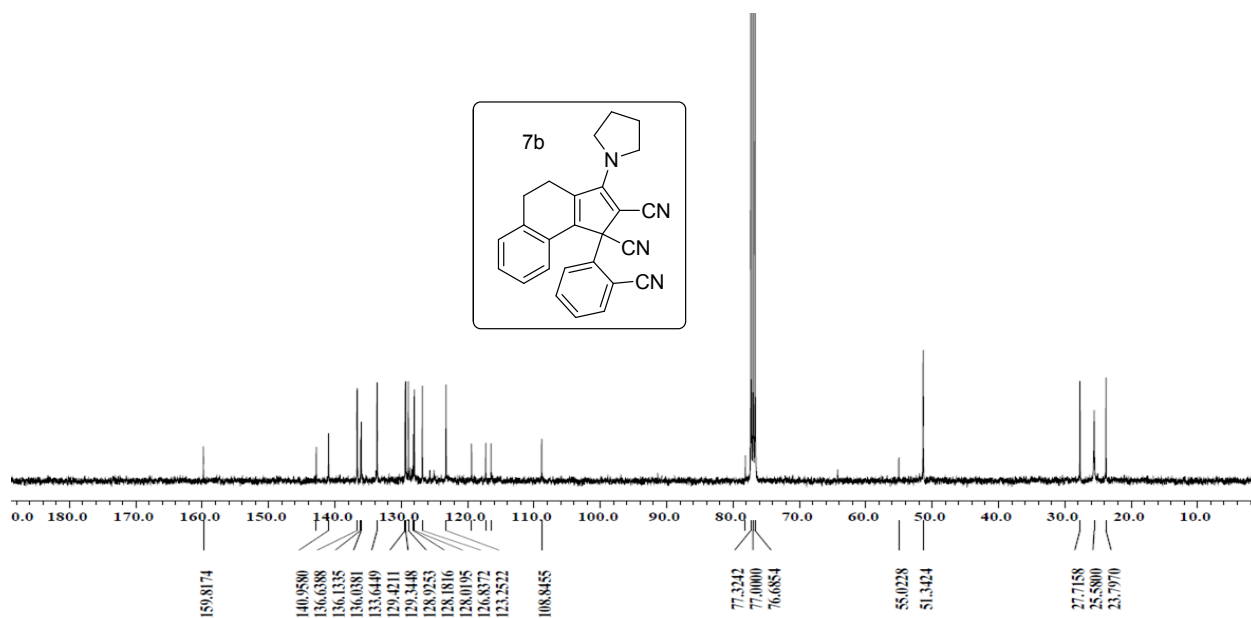

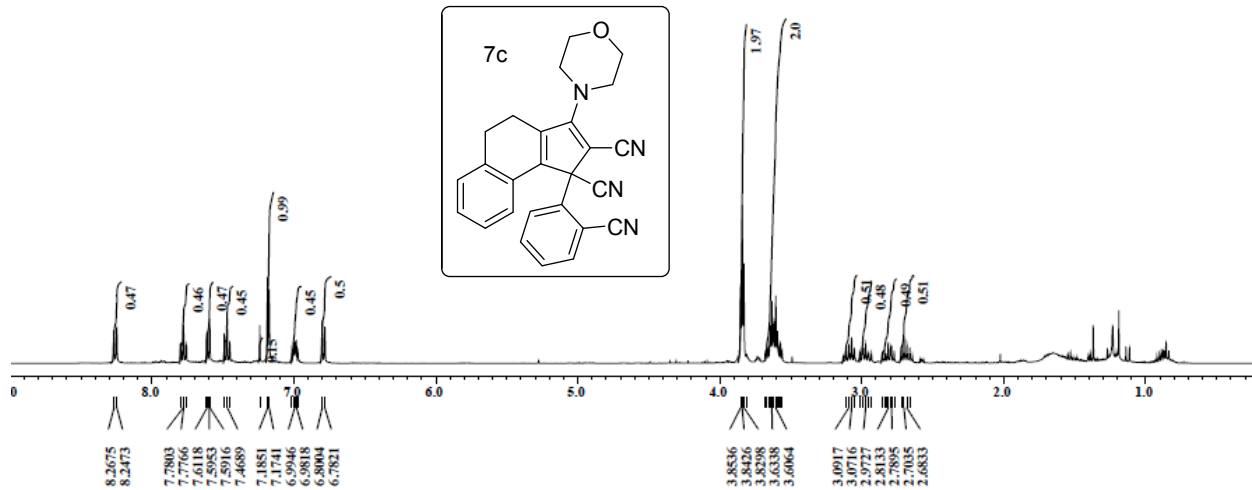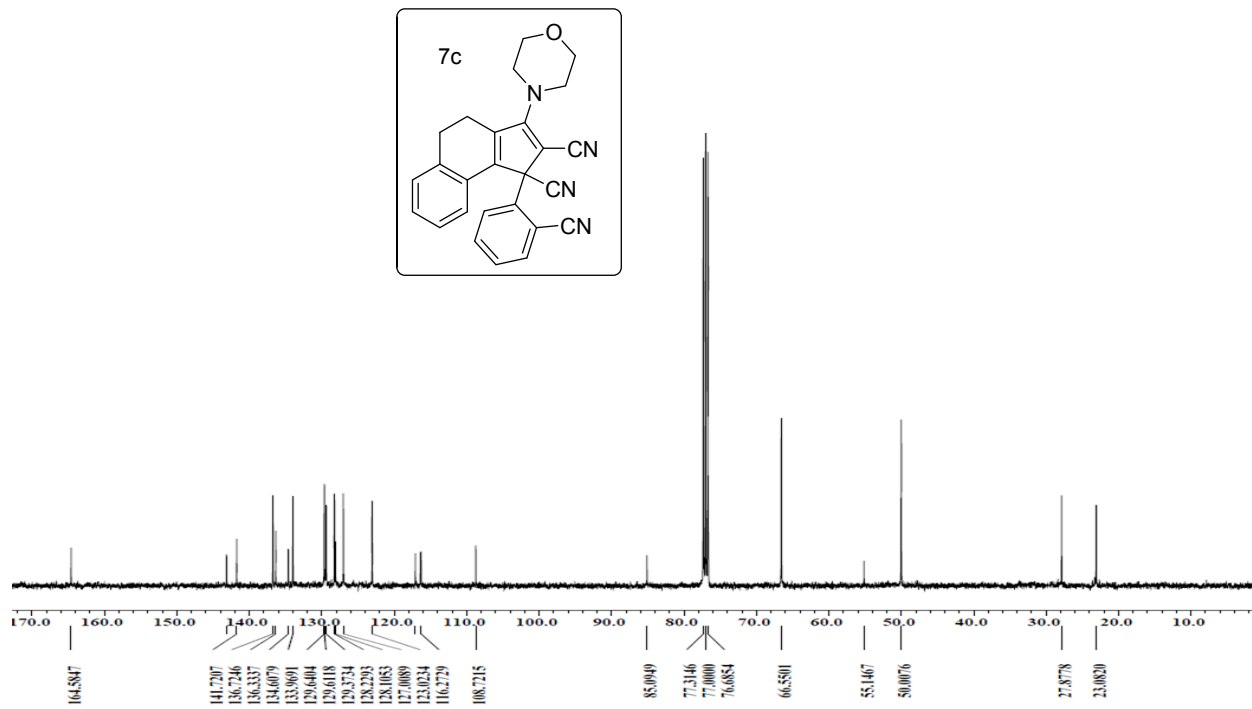

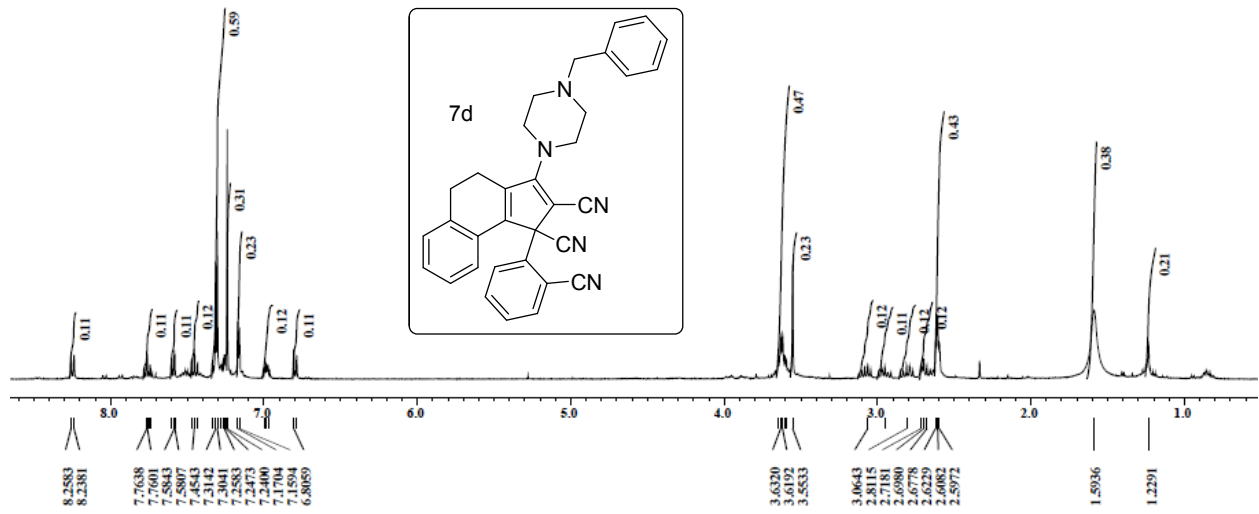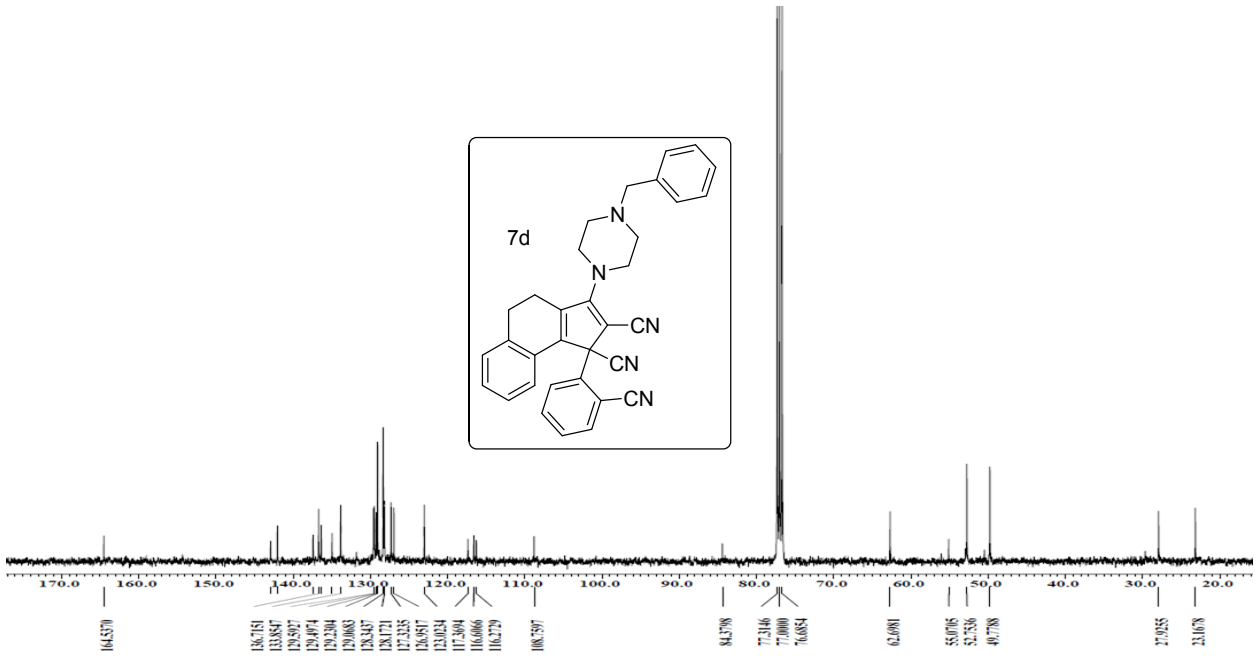

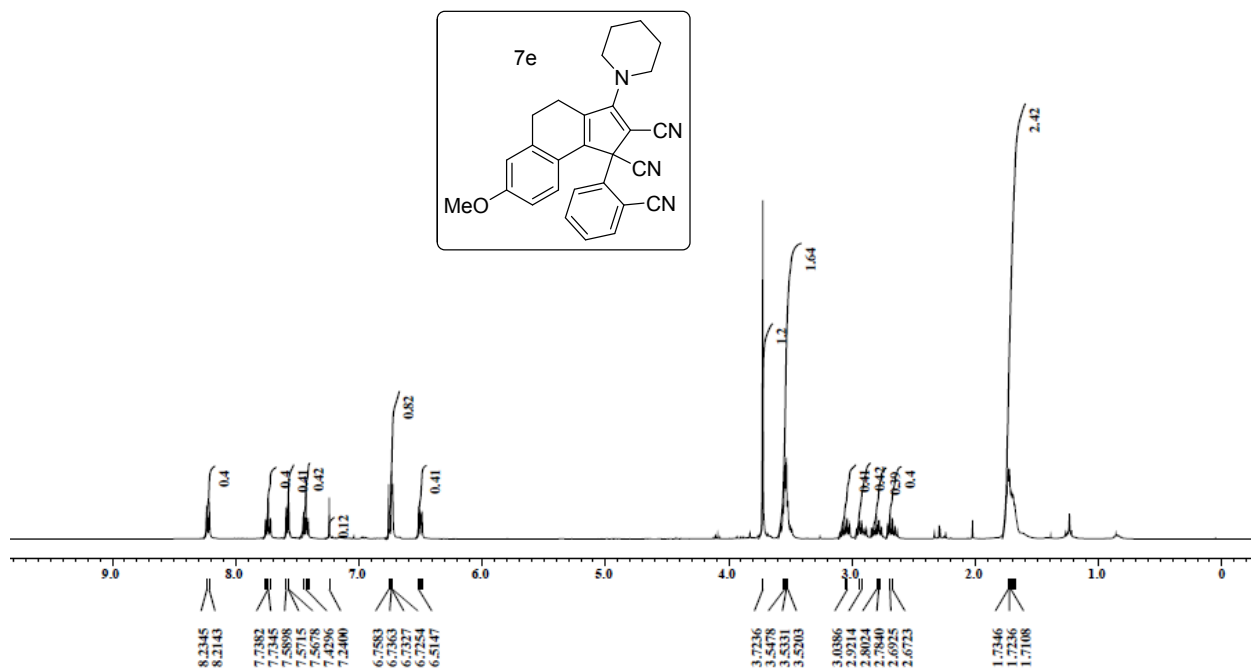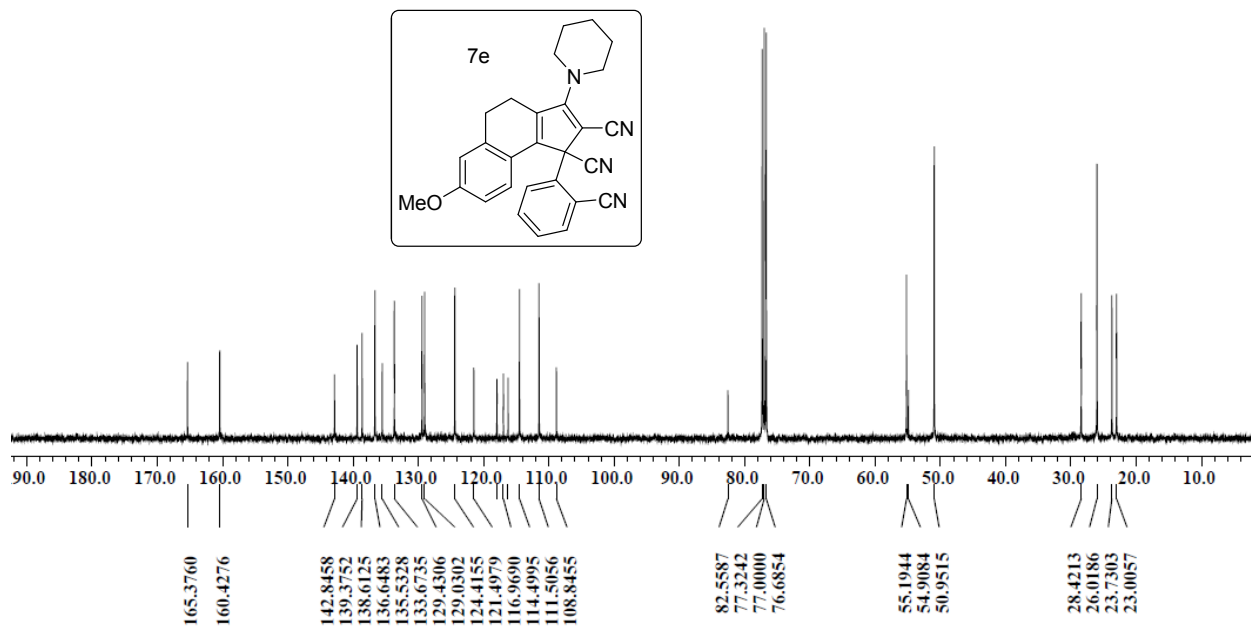

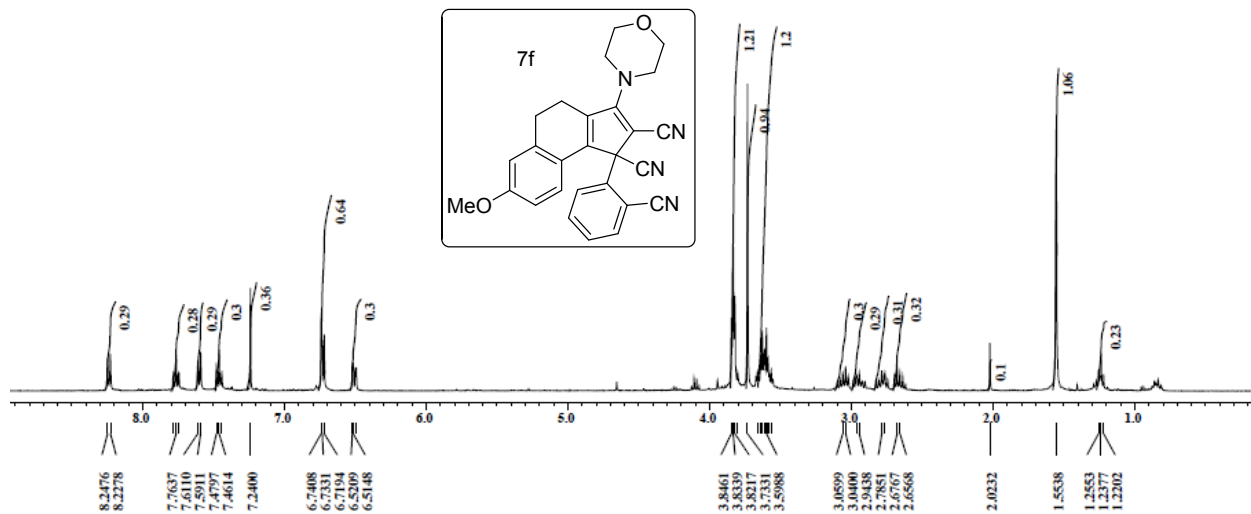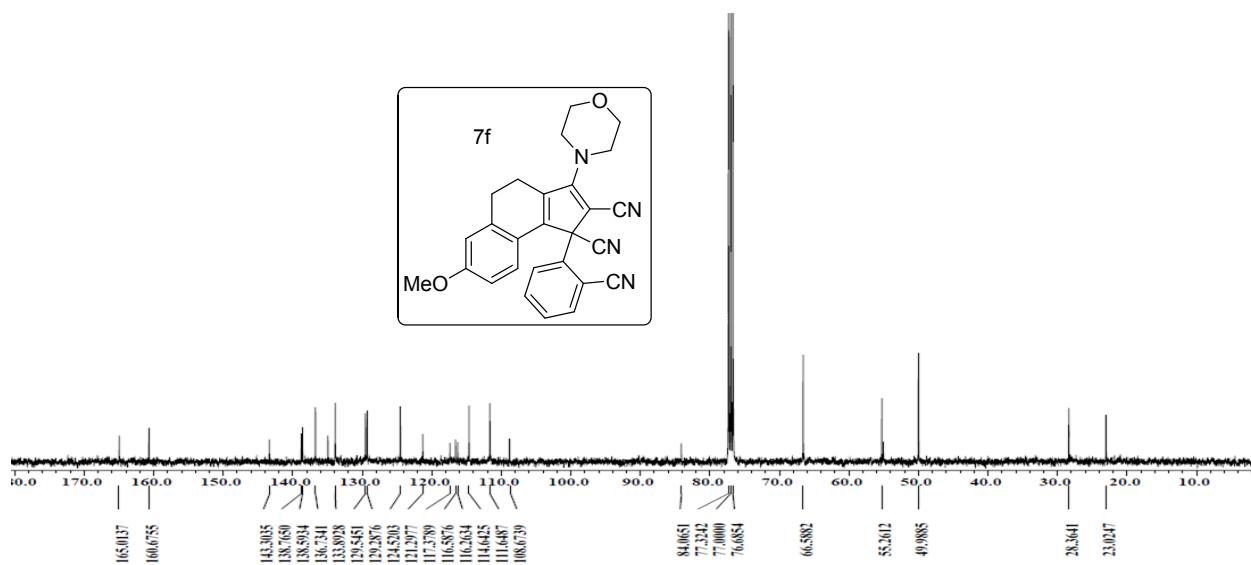

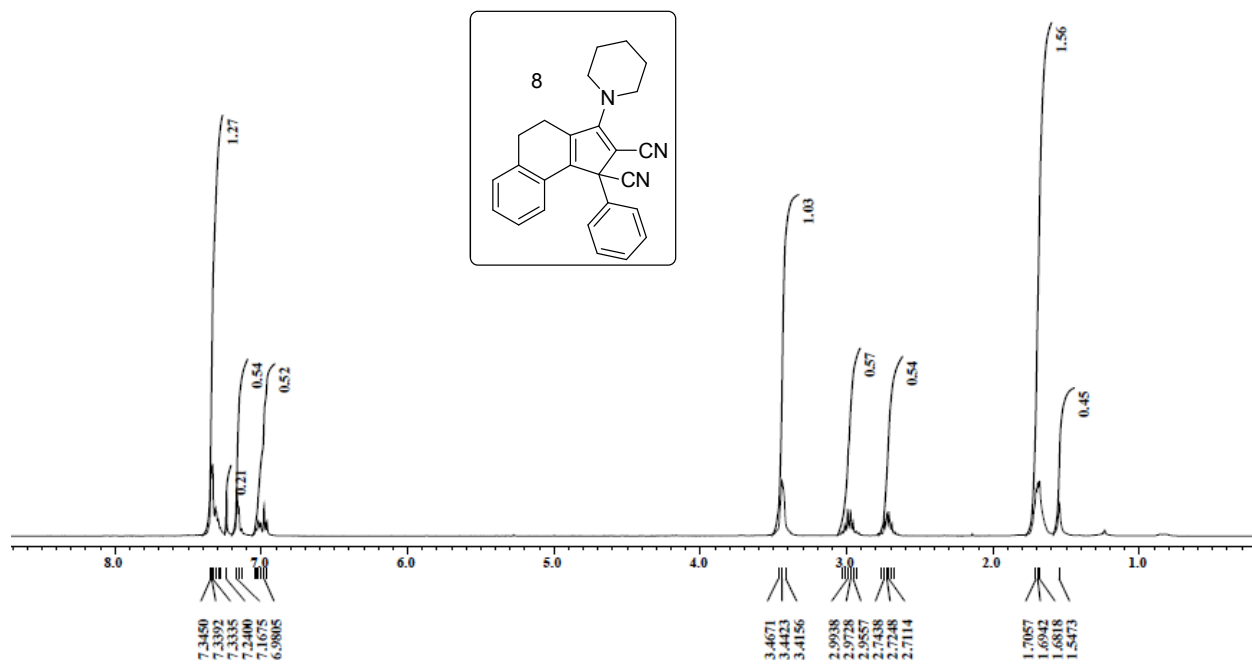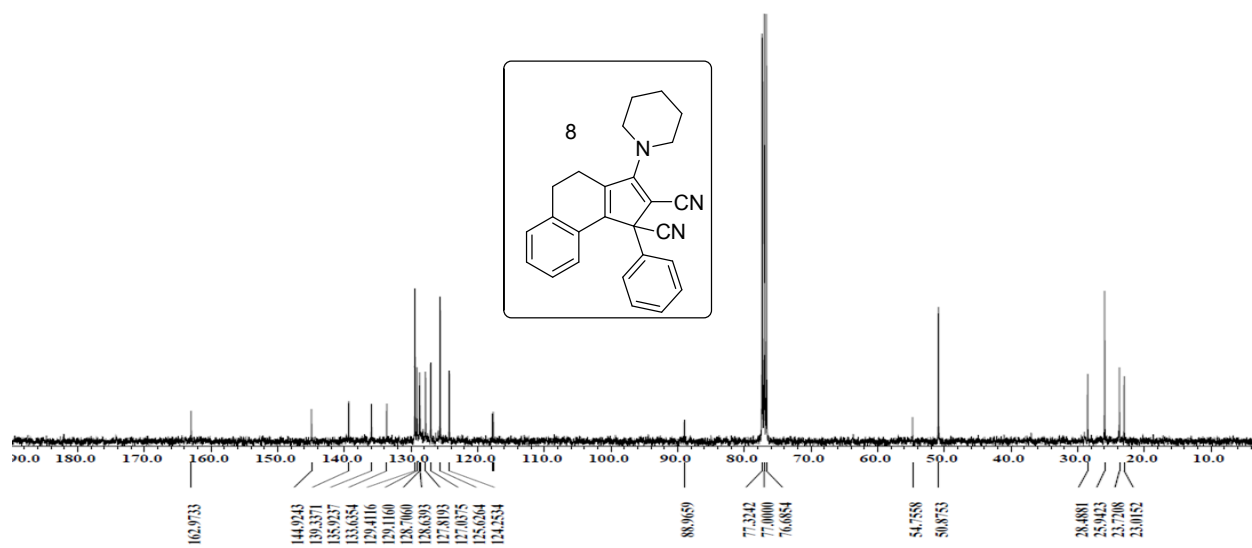



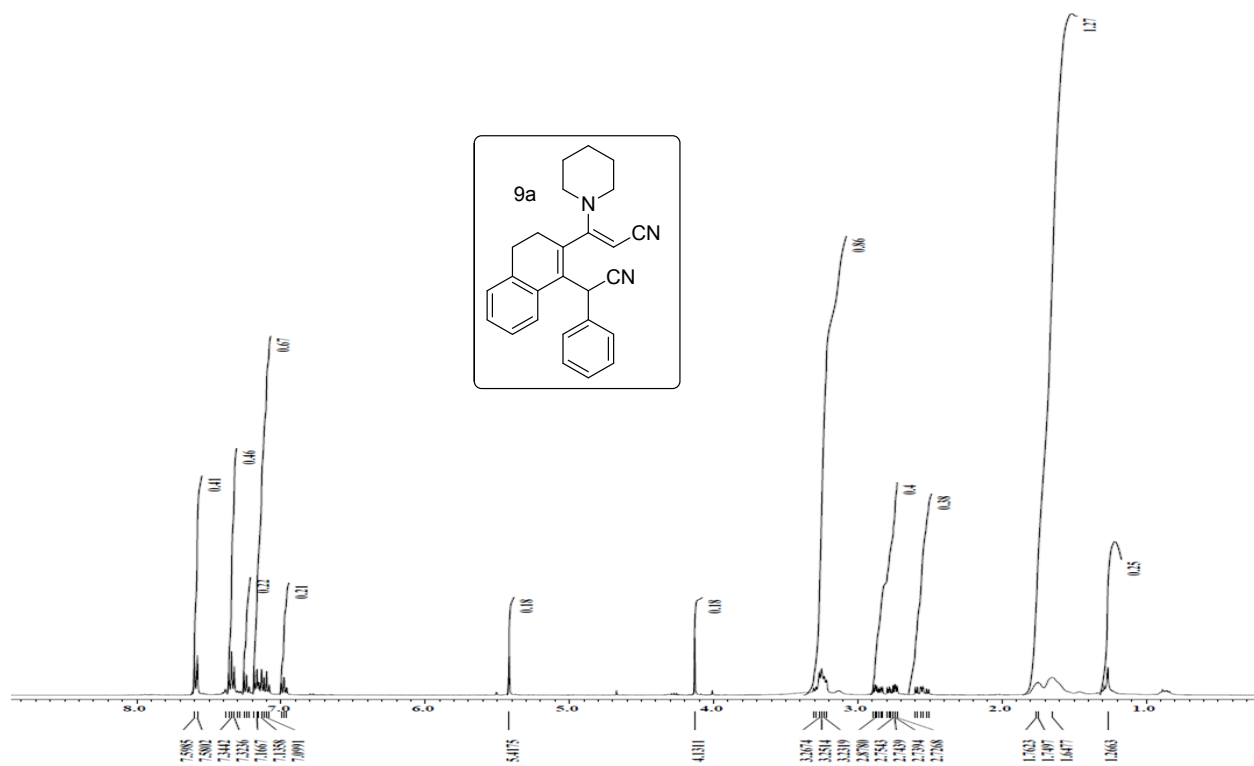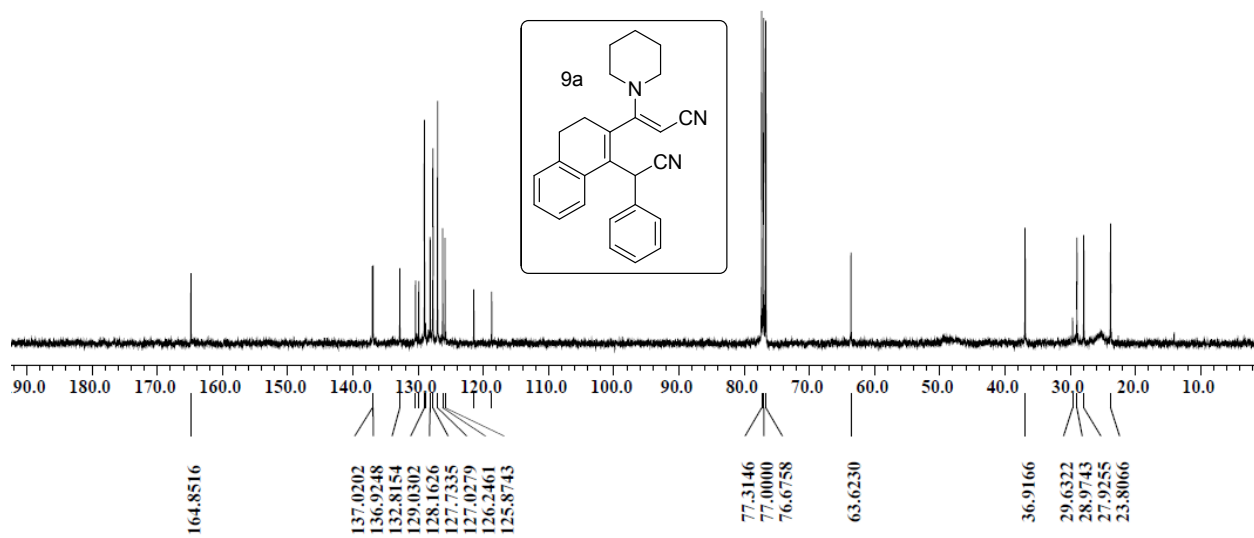

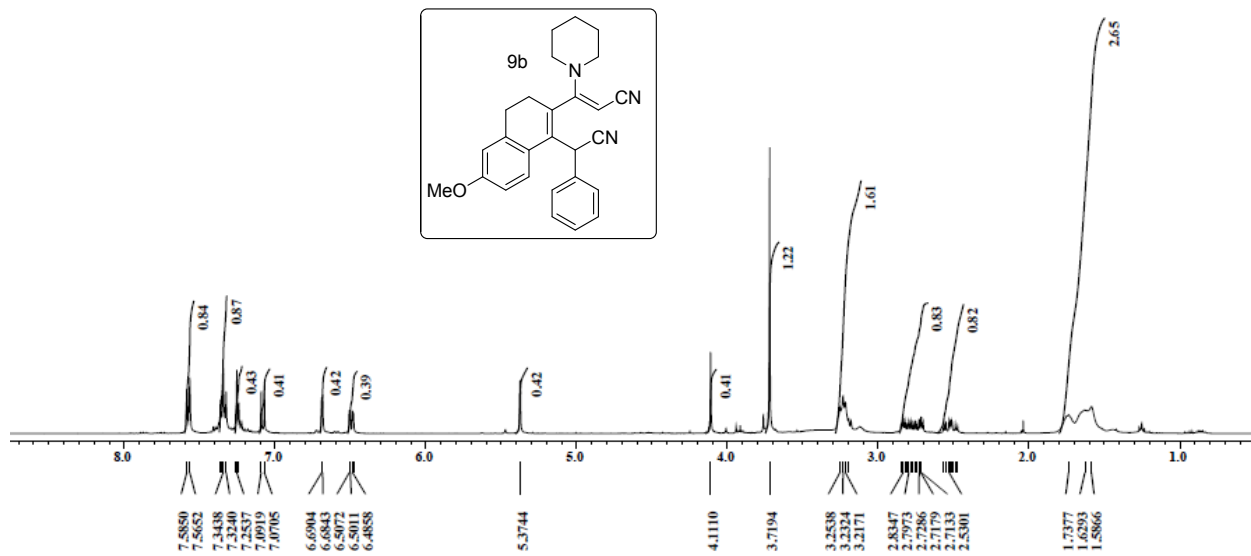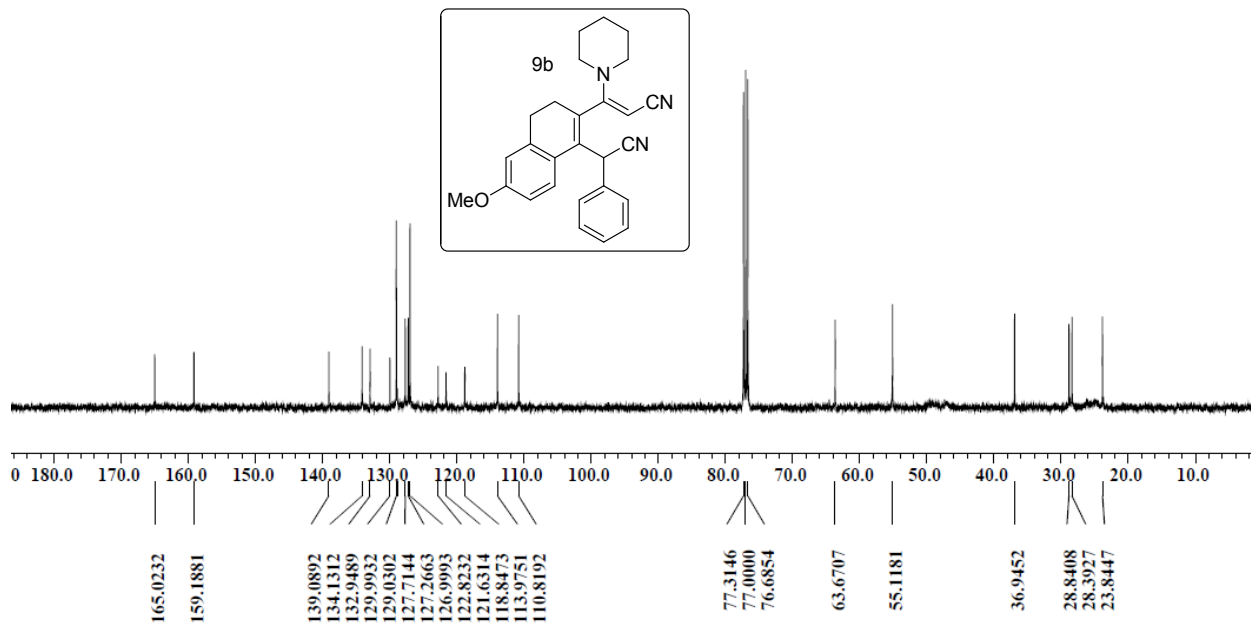

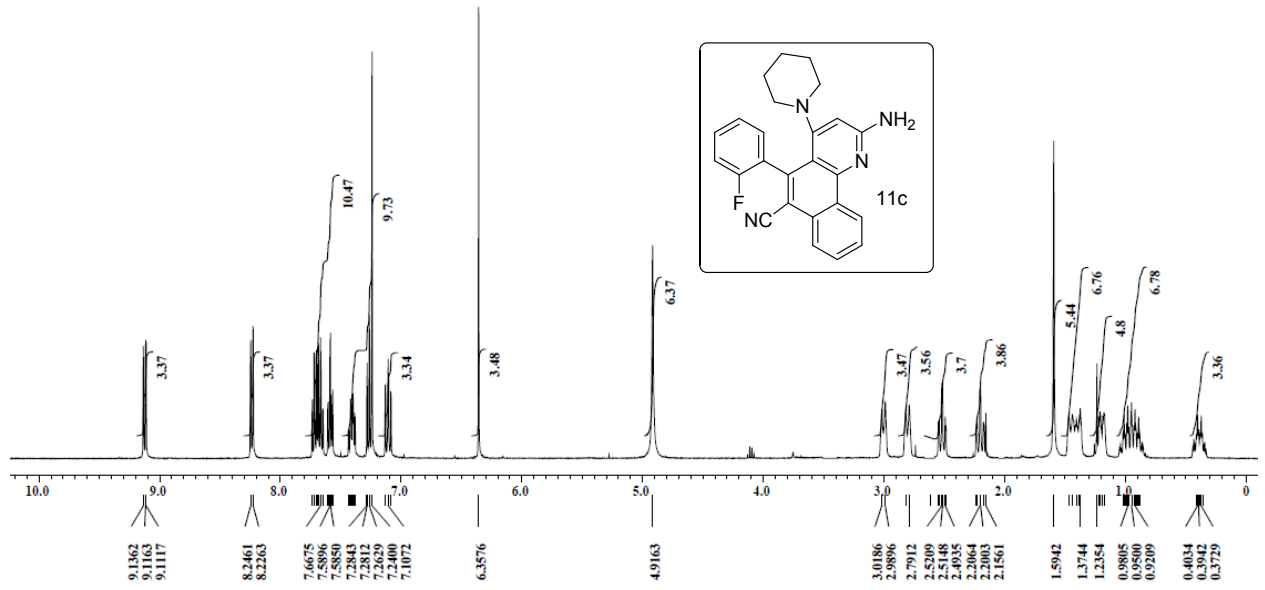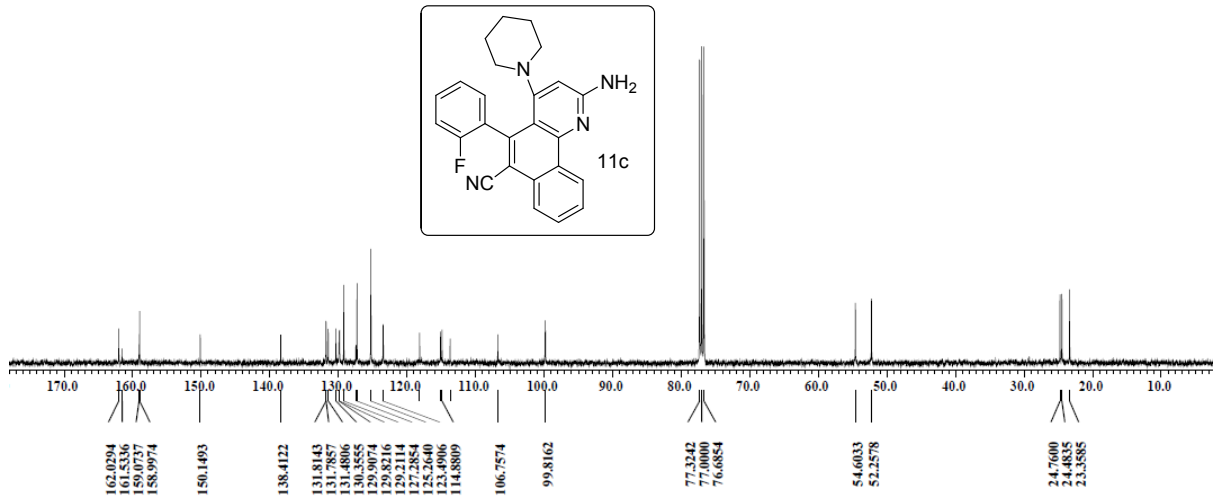

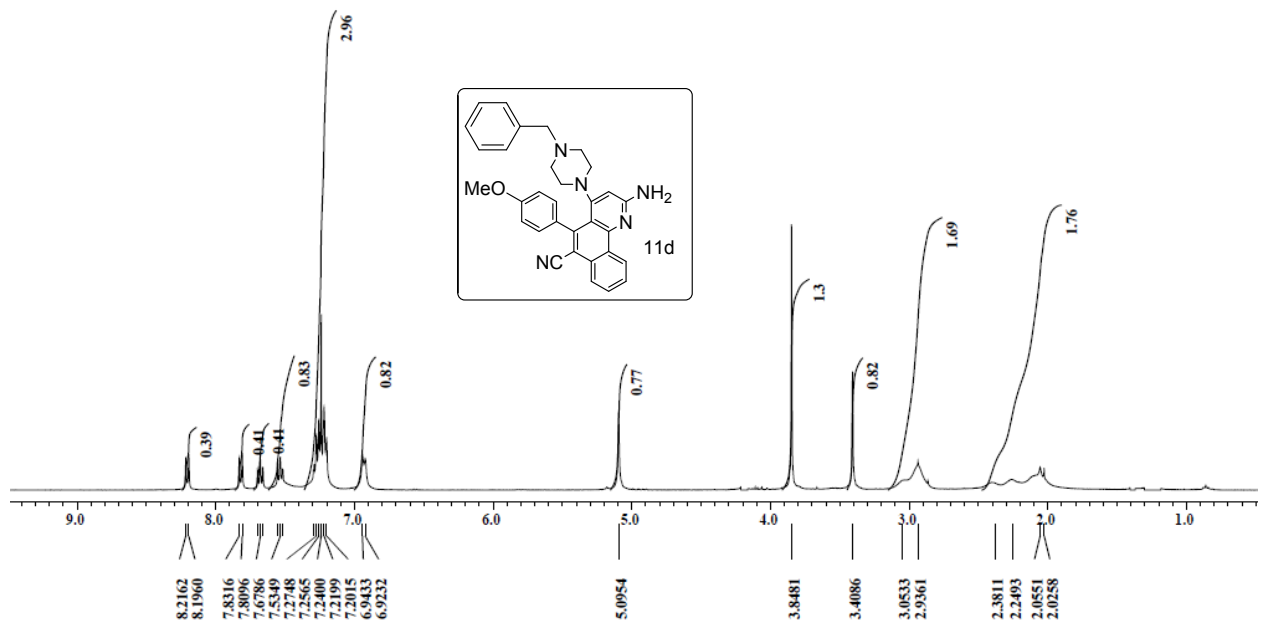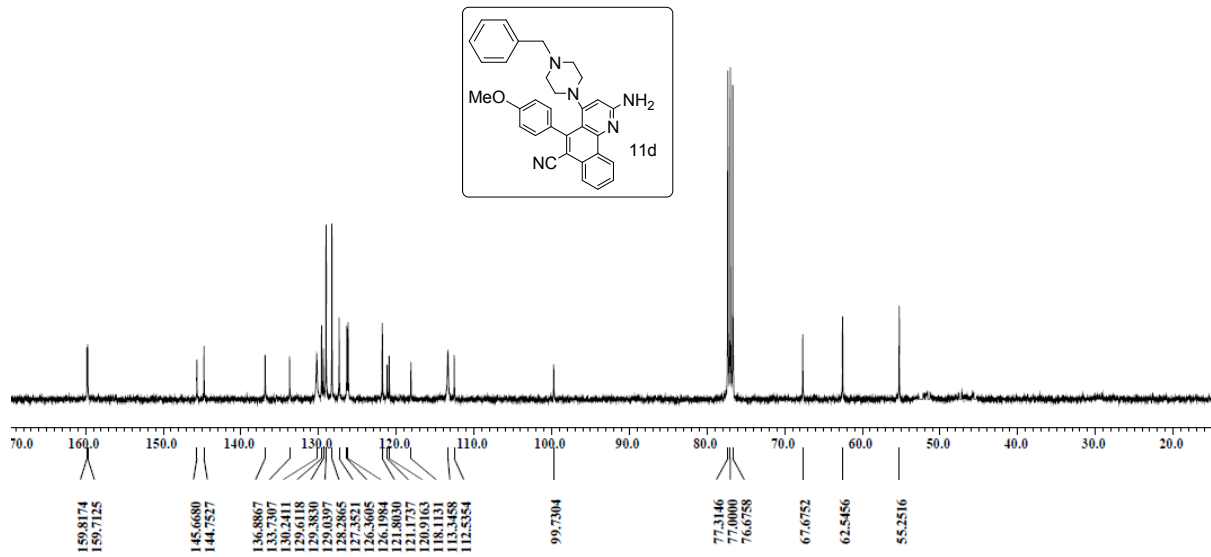

Supplement: c4ra13612h1.pdf [file c4ra13612h1.pdf]
